# Supplementary material for: Exposure to (Poly)phenol Metabolites after a Fruit and Vegetable Supplement Intake: A Double-Blind, Cross-Over, Randomized Trial
Source: MDPI journal article supplement (doi:10.3390/nu14224913), 2022-11-20
Supplement: s1 [file s1]

## Supplemental Material

### Exposure to (poly)phenol metabolites after a fruit and vegetable supplement intake: attempting to mimic the 5-a-day (poly)phenol variety – A double-blind, cross-over, randomized trial

Cindy Romain <sup>1</sup>, Letizia Bresciani <sup>2,\*</sup>, Jananee Muralidharan <sup>1</sup>, Pedro Mena <sup>2</sup>, Linda H. Chung<sup>3</sup>, Pedro E. Alcaraz<sup>3</sup>, Daniele Del Rio <sup>2</sup>, Julien Cases <sup>1,\*</sup>

<sup>1</sup>Innovation and Scientific Affairs, Fytexia, 34350 Vendres, France

<sup>2</sup>Human Nutrition Unit, Department of Food & Drug, University of Parma, Via Volturno 39, 43125 Parma, Italy

<sup>3</sup> Research Center for High Performance Sport - UCAM Universidad Católica de Murcia – Murcia – Spain

\*Correspondence: L.B.: letizia.bresciani@unipr.it; Tel.: +39 0521 903906; J.C.: jcases@fytextia.com; Tel: +33 0467 219098

#### Chemicals and reagents

For powder quantification, punicalin  $\alpha$ /A and punicalin  $\beta$ /B mixture, HHDP-gallagyl-hexoside (punicalagin  $\alpha$ ), ellagic acid, (+)-catechin, (–)-epicatechin, (–)-epicatechin gallate, (–)-epigallocatechin gallate, apigenin 8-C-glucoside (vitexin), luteolin-O-hexoside, apigenin-7-O-rhamnoglucoside, quercetin, isorhamnetin, quercetin-O-rutinoside (rutin), luteolin-8-C glucoside (orientin), 3-hydroxybenzoic acid, 3,4-dihydroxybenzoic acid (protocatechuic acid), 3,4,5-trihydroxybenzoic acid (gallic acid), 5-caffeoylquinic acid (chlorogenic acid), hydroxytyrosol, oleuropein, verbascoside (caffeoyl phenylethanoid glycoside), naringenin, naringenin-7-O-rutinoside (narirutin), hesperetin-7-O-rutinoside (hesperidin), isosakuranetin-O-rutinoside (didymnin), cyanidin-3-O-hexoside and cyanidin-3-O-rutinoside were purchased from Merck KGaA (Darmstadt, Germany). Procyanidin B2 and piceid (resveratrol-O-glucoside) were purchased from PhytoLab (GmbH & Co. KG, Vestenbergsgreuth, Germany).

For metabolite and catabolite quantification, 3'-methoxycinnamic acid-4'-sulfate, 3'-methoxycinnamic acid-4'-glucuronide, 4'-methoxycinnamic acid-3'-sulfate, 4'-methoxycinnamic acid-3'-glucuronide, 3-(3'-methoxyphenyl)propanoic acid-4'-sulfate, 3-(4'-methoxyphenyl)propanoic acid-3'-glucuronide, 3-(4'-hydroxyphenyl)propanoic acid-3'-sulfate, 3-(4'-hydroxyphenyl)propanoic acid-3'-glucuronide, 3'-hydroxycinnamic acid-4'-glucuronide and 4'-hydroxycinnamic acid-3'-glucuronide were purchased from Toronto Research Chemicals (North York, Ontario, Canada). Prof. Alan Crozier (University of California Davis) kindly supplied feruloylglycine. 3-Methoxybenzoic acid-4-glucuronide, 3-methoxybenzoic acid-4-sulfate, 4-methoxybenzoic acid-3-glucuronide, 4-hydroxybenzoic acid-3-sulfate, 4-hydroxybenzoic acid-3-glucuronide, benzoic acid-4-sulfate, benzoic acid-4-glucuronide were provided by Dr. Colin Kay (N.C. State University's Plants for Human Health Institute). 5-Phenyl- $\gamma$ -valerolactone-3'-glucuronide, 5-phenyl- $\gamma$ -valerolactone-3'-sulfate, 5-(4'-hydroxyphenyl)- $\gamma$ -valerolactone-3'-sulfate, 5-(5'-hydroxyphenyl)- $\gamma$ -valerolactone-3'-glucuronide were synthesized in house [1,2]. HPLC-grade solvents were purchased from VWR International (Radnor, PA, USA). Ultrapure water from MilliQ system (Millipore, Bedford, MA, USA) was used throughout the experiment.

#### References

- [1]. Curti, C., N. Brindani, L. Battistini, A. Sartori, G. Pelosi, P. Mena, F. Brighenti, F. Zanardi and D. Del Rio (2015). "Catalytic, Enantioselective Vinylogous Mukaiyama Aldol Reaction of Furan-Based Dienoxy Silanes: A Chemodivergent Approach to  $\gamma$ -Valerolactone Flavan-3-ol Metabolites and  $\delta$ -Lactone Analogues." *Advanced Synthesis & Catalysis* 357(18): 4082-4092.
- [2]. Brindani, N., P. Mena, L. Calani, I. Benzie, S. W. Choi, F. Brighenti, F. Zanardi, C. Curti and D. Del Rio (2017). "Synthetic and analytical strategies for the quantification of phenyl-gamma-valerolactone conjugated metabolites in human urine." *Mol Nutr Food Res* 61(9).

**Supplemental Table S1.** Retention time (RT), spectrometric characteristics and standards used for quantification of detected native (poly)phenols occurring in the supplement.

| Compound                                  | RT<br>(min) | [M-H] <sup>-</sup> | MS <sup>2</sup>                   | MS <sup>3</sup>                             | Standard                                                           |
|-------------------------------------------|-------------|--------------------|-----------------------------------|---------------------------------------------|--------------------------------------------------------------------|
| <b>Ellagitannins</b>                      |             |                    |                                   |                                             |                                                                    |
| Ellagic acid                              | 6.35        | 301                | 301, 257, 229, 185, 151, 121      |                                             | Ellagic acid                                                       |
| Galloyl-hexoside                          | 0.99        | 331                | 169, 271, 211, 241, 193, 125      | 125                                         | Gallagyl-hexoside (Punicalin $\alpha$ /A and Punicalin $\beta$ /B) |
| Galloyl-hexoside                          | 1.32        | 331                | 169, 271, 211, 241, 193, 125      | 125                                         | Gallagyl-hexoside (Punicalin $\alpha$ /A and Punicalin $\beta$ /B) |
| Galloyl-hexoside                          | 1.66        | 331                | 169, 271, 211, 241, 193, 125      | 125                                         | Gallagyl-hexoside (Punicalin $\alpha$ /A and Punicalin $\beta$ /B) |
| Galloyl-hexoside                          | 2.00        | 331                | 271, 241, 169                     | 125                                         | Gallagyl-hexoside (Punicalin $\alpha$ /A and Punicalin $\beta$ /B) |
| Galloyl-hexoside                          | 2.34        | 331                | 271, 241, 169                     | 125                                         | Gallagyl-hexoside (Punicalin $\alpha$ /A and Punicalin $\beta$ /B) |
| Ellagic acid hexoside                     | 5.37        | 463                | 301, 300, 302                     | 257, 301, 229, 284, 185, 300, 255, 213      | Gallagyl-hexoside (Punicalin $\alpha$ /A and Punicalin $\beta$ /B) |
| Ellagic acid dimethyl ether glucuronide   | 6.31        | 507                | 331, 489                          |                                             | Gallagyl-hexoside (Punicalin $\alpha$ /A and Punicalin $\beta$ /B) |
| Galloyl-HHDP-hexoside                     | 2.01        | 633                | 301, 249, 481, 564, 624, 275, 463 | 301, 257, 284, 229, 157                     | Gallagyl-hexoside (Punicalin $\alpha$ /A and Punicalin $\beta$ /B) |
| Galloyl-HHDP-hexoside                     | 2.38        | 633                | 301, 481, 249, 275, 565, 610      | 257, 185                                    | Gallagyl-hexoside (Punicalin $\alpha$ /A and Punicalin $\beta$ /B) |
| Galloyl-HHDP-hexoside                     | 2.75        | 633                | 615, 301, 481, 419, 275           | 571, 419, 299, 343, 329, 287                | Gallagyl-hexoside (Punicalin $\alpha$ /A and Punicalin $\beta$ /B) |
| Galloyl-HHDP-hexoside                     | 3.49        | 633                | 301, 615, 431, 275, 481           |                                             | Gallagyl-hexoside (Punicalin $\alpha$ /A and Punicalin $\beta$ /B) |
| Galloyl-HHDP-hexoside                     | 3.83        | 633                | 301, 421, 275, 451, 615, 589      |                                             | Gallagyl-hexoside (Punicalin $\alpha$ /A and Punicalin $\beta$ /B) |
| Galloyl-HHDP-hexoside                     | 4.46        | 633                | 301, 275                          | 257, 301, 229, 284, 273, 185                | Gallagyl-hexoside (Punicalin $\alpha$ /A and Punicalin $\beta$ /B) |
| Galloyl-HHDP-hexoside                     | 4.81        | 633                | 301, 463, 275                     | 257, 284, 229, 185, 301, 200, 258, 285, 173 | Gallagyl-hexoside (Punicalin $\alpha$ /A and Punicalin $\beta$ /B) |
| Gallagyl-hexoside (Punicalin $\alpha$ /A) | 2.21        | 781                | 601, 721, 575                     | 299, 271                                    | Gallagyl-hexoside (Punicalin $\alpha$ /A and Punicalin $\beta$ /B) |
| Gallagyl-hexoside (Punicalin $\beta$ /B)  | 2.62        | 781                | 601, 721, 575                     |                                             | Gallagyl-hexoside (Punicalin $\alpha$ /A and Punicalin $\beta$ /B) |
| Bis-HHDP-hexoside (Pedunculagin I isomer) | 3.32        | 783                | 301, 481, 765                     | 257, 229, 301                               | Gallagyl-hexoside (Punicalin $\alpha$ /A and Punicalin $\beta$ /B) |
| Bis-HHDP-hexoside (Pedunculagin I isomer) | 3.68        | 783                | 301, 481, 765                     | 257, 229, 301                               | Gallagyl-hexoside (Punicalin $\alpha$ /A and Punicalin $\beta$ /B) |
| Bis-HHDP-hexoside                         | 4.01        | 783                | 301, 481, 765                     | 257, 229, 301                               | Gallagyl-hexoside (Punicalin $\alpha$ /A and Punicalin $\beta$ /B) |

|                                                                      |      |                          |                                           |                                      |                                                                    |
|----------------------------------------------------------------------|------|--------------------------|-------------------------------------------|--------------------------------------|--------------------------------------------------------------------|
| (Pedunculagin I isomer)<br>Galloyl-bis-HHDP-hexoside<br>(Casuarinin) | 4.64 | 935                      | 633, 917, 873, 659                        | 571, 589, 615, 299, 481              | HHDP-gallagyl-hexoside (Punicalagin $\alpha$ )                     |
| Punicalagin isomer                                                   | 3.29 | 1083                     | 807, 601, 1021, 721, 959,<br>575          |                                      | HHDP-gallagyl-hexoside (Punicalagin $\alpha$ )                     |
| HHDP-gallagyl-hexoside<br>(Punicalagin $\alpha$ )                    | 3.97 | 1083                     | 601, 781, 575                             | 299, 271, 243                        | HHDP-gallagyl-hexoside (Punicalagin $\alpha$ )                     |
| HHDP-gallagyl-hexoside<br>(Punicalagin $\beta$ )                     | 4.36 | 1083                     | 601, 781, 575                             | 299, 271, 243                        | HHDP-gallagyl-hexoside (Punicalagin $\beta$ )                      |
| Di(HHDP-galloylglucose)-<br>pentoside                                | 3.41 | 707 [M-2H] <sup>2-</sup> | 783, 613, 633, 1113, 933                  | 301, 721, 481, 765, 421,<br>275, 703 | HHDP-gallagyl-hexoside (Punicalagin $\beta$ )                      |
| Di(HHDP-galloylglucose)-<br>pentoside                                | 3.77 | 707 [M-2H] <sup>2-</sup> | 783, 613, 633, 1113, 933                  | 301, 721, 481, 765, 421,<br>275, 703 | HHDP-gallagyl-hexoside (Punicalagin $\beta$ )                      |
| Di(HHDP-galloylglucose)-<br>pentoside                                | 4.13 | 707 [M-2H] <sup>2-</sup> | 783, 613, 633, 1113, 933                  | 301, 721, 481, 765, 421,<br>275, 703 | HHDP-gallagyl-hexoside (Punicalagin $\beta$ )                      |
| <b>Gallotannins</b>                                                  |      |                          |                                           |                                      |                                                                    |
| Digalloylglucose                                                     | 4.44 | 483                      | 271, 331, 313, 272                        | 211, 169                             | Gallagyl-hexoside (Punicalin $\alpha$ /A and Punicalin $\beta$ /B) |
| Digalloylglucose                                                     | 2.40 | 483                      | 331, 313, 169                             |                                      | Gallagyl-hexoside (Punicalin $\alpha$ /A and Punicalin $\beta$ /B) |
| Digalloylglucose                                                     | 3.47 | 483                      | 331, 313, 169                             |                                      | Gallagyl-hexoside (Punicalin $\alpha$ /A and Punicalin $\beta$ /B) |
| Digalloylglucose                                                     | 3.94 | 483                      | 423, 313, 271, 331, 193,<br>241, 169      |                                      | Gallagyl-hexoside (Punicalin $\alpha$ /A and Punicalin $\beta$ /B) |
| Digalloylglucose                                                     | 4.28 | 483                      | 423, 271, 313, 169, 465                   |                                      | Gallagyl-hexoside (Punicalin $\alpha$ /A and Punicalin $\beta$ /B) |
| Trigalloylglucose                                                    | 5.30 | 635                      | 465, 483, 466, 313, 484                   | 313, 169, 295                        | Gallagyl-hexoside (Punicalin $\alpha$ /A and Punicalin $\beta$ /B) |
| <b>Dihydrochalcones</b>                                              |      |                          |                                           |                                      |                                                                    |
| Phloretin                                                            | 8.73 | 273                      | 167                                       | 123, 125, 151                        | (+)-Catechin                                                       |
| <b>Flavan-3-ols</b>                                                  |      |                          |                                           |                                      |                                                                    |
| (+)-Catechin                                                         | 4.53 | 289                      | 245, 205, 179, 125                        |                                      | (+)-Catechin                                                       |
| (-)-Epicatechin                                                      | 5.06 | 289                      | 245, 205, 179, 125                        |                                      | (-)-Epicatechin                                                    |
| (+)-Gallocatechin                                                    | 3.51 | 305                      | 179, 221, 219, 261, 165,<br>125           |                                      | (-)-Epicatechin                                                    |
| (-)-Epigallocatechin                                                 | 4.28 | 305                      | 179, 221, 219, 261, 165,<br>125           |                                      | (-)-Epicatechin                                                    |
| (Epi)catechin gallate                                                | 5.97 | 441                      | 289, 169, 331, 271, 397,<br>303, 193, 243 |                                      | (-)-Epicatechin gallate                                            |
| (Epi)gallocatechin-<br>methylgallate                                 | 5.84 | 471                      | 183, 305, 287, 168, 269                   |                                      | (-)-Epicatechin gallate                                            |

|                                                                    |      |              |                                                                 |                              |
|--------------------------------------------------------------------|------|--------------|-----------------------------------------------------------------|------------------------------|
| (-)-Epigallocatechin gallate                                       | 5.16 | 457          | 169, 331, 305, 269, 193, 287                                    | (-)-Epigallocatechin gallate |
| (Epi)gallocatechin gallate                                         | 5.50 | 457          | 169, 331, 305, 287, 193, 269                                    | (-)-Epigallocatechin gallate |
| Procyanidin dimer A-type                                           | 5.78 | 575          | 449, 423, 289, 285, 539, 557, 407                               | Procyanidin B2               |
| Procyanidin dimer B-type                                           | 4.23 | 577          | 425, 407, 451, 289, 559, 245                                    | Procyanidin B2               |
| Procyanidin dimer B-type                                           | 4.73 | 577          | 425, 407, 451, 289, 559, 245                                    | Procyanidin B2               |
| Procyanidin dimer B-type                                           | 4.47 | 577          | 425, 407, 451, 289, 559, 246                                    | Procyanidin B2               |
| Procyanidin dimer B-type                                           | 5.47 | 577          | 425, 407, 451, 289, 559, 247                                    | Procyanidin B2               |
| Prodelphinidin dimer B-type [1 unit of (epi)GC+1(epi)C]            | 3.70 | 593          | 549, 575, 467, 423, 289, 305, 440                               | Procyanidin B2               |
| Prodelphinidin dimer B-type [1 unit of (epi)GC+1(epi)C]            | 4.39 | 593          | 549, 575, 467, 423, 289, 305, 441                               | Procyanidin B2               |
| Prodelphinidin dimer B-type gallate [1 unit of (epi)GC+1(epi)C]    | 4.89 | 745          | 593, 423, 575, 619, 577, 467, 559, 407, 305, 727, 457, 289, 331 | Procyanidin B2               |
| Prodelphinidin tetramer B-type gallate [2 unit of (epi)GC+2(epi)C] | 4.06 | 745 [M-2H]2- | 701, 575, 601                                                   | Procyanidin B2               |
| Prodelphinidin tetramer B-type gallate [2 unit of (epi)GC+2(epi)C] | 4.46 | 745 [M-2H]2- | 701, 575, 593                                                   | Procyanidin B2               |
| Prodelphinidin dimer B-type gallate [2 units (epi)GC]              | 6.78 | 761          | 609, 686, 563, 738, 693, 439, 599, 348, 744, 256                | Procyanidin B2               |
| Procyanidin trimer B-type                                          | 4.50 | 865          | 695, 575, 577, 713, 739, 847, 543, 287                          |                              |
| Procyanidin trimer B-type                                          | 4.86 | 865          | 695, 739, 713, 577, 575, 780, 847, 425, 587, 801, 287           |                              |
| Procyanidin trimer B-type                                          | 5.29 | 865          | 695, 712, 577, 739, 407, 425, 287                               |                              |
| (Epi)catechin-gallate dimer                                        | 6.03 | 885          | 441, 442, 443, 289                                              |                              |
| <b>Flavones</b>                                                    |      |              |                                                                 |                              |

|                                                                                           |      |     |                                                  |                                        |                                           |
|-------------------------------------------------------------------------------------------|------|-----|--------------------------------------------------|----------------------------------------|-------------------------------------------|
| Apigenin                                                                                  | 9.24 | 269 | 225, 149                                         |                                        |                                           |
| Trihydroxyflavone                                                                         | 5.23 | 269 | 225, 227, 241, 197, 182, 251                     |                                        | Naringenin                                |
| Apigenin- <i>O</i> -hexoside                                                              | 6.88 | 431 | 269                                              |                                        | Apigenin 8- <i>C</i> -glucoside (Vitexin) |
| Luteolin- <i>O</i> -hexoside                                                              | 4.67 | 447 | 285                                              | 241, 243, 199, 175, 257, 217           | Luteolin- <i>O</i> -hexoside              |
| Luteolin- <i>O</i> -hexoside                                                              | 6.28 | 447 | 285                                              | 241, 243, 199, 175, 257, 217           | Luteolin- <i>O</i> -hexoside              |
| Luteolin- <i>O</i> -hexoside                                                              | 6.67 | 447 | 285                                              | 241, 243, 199, 175, 257, 217           | Luteolin- <i>O</i> -hexoside              |
| Luteolin- <i>O</i> -hexoside                                                              | 7.02 | 447 | 285                                              | 241, 243, 199, 175, 257, 217           | Luteolin- <i>O</i> -hexoside              |
| Dihydroluteolin- <i>O</i> -hexoside                                                       | 5.25 | 449 | 287                                              | 243,125,161,269                        | Luteolin- <i>O</i> -hexoside              |
| Apigenin- <i>O</i> -rutinoside                                                            | 6.63 | 577 | 269                                              |                                        | Apigenin-7- <i>O</i> -rhamnoglucoside     |
| Luteolin- <i>O</i> -rutinoside                                                            | 6.07 | 593 | 285                                              | 241, 217, 243, 199, 175, 257           | Apigenin-7- <i>O</i> -rhamnoglucoside     |
| Luteolin- <i>O</i> -rutinoside                                                            | 8.10 | 593 | 285                                              | 241, 217, 243, 199, 175, 257           | Apigenin-7- <i>O</i> -rhamnoglucoside     |
| Chrysoeriol- <i>O</i> -rutinoside or<br>Diosmetin- <i>O</i> -rutinoside                   | 6.85 | 607 | 299, 284                                         | 284                                    | Apigenin-7- <i>O</i> -rhamnoglucoside     |
| Luteolin- <i>O</i> -dihexoside<br>(tentative identification)                              | 5.45 | 609 | 447, 285                                         |                                        | Apigenin-7- <i>O</i> -rhamnoglucoside     |
| Luteolin- <i>O</i> -dihexoside                                                            | 7.42 | 609 | 285, 447                                         | 241,243,217,199,175,257                | Apigenin-7- <i>O</i> -rhamnoglucoside     |
| <b>Flavonols</b>                                                                          |      |     |                                                  |                                        |                                           |
| Quercetin                                                                                 | 8.52 | 301 | 179, 151                                         |                                        | Quercetin                                 |
| Rhamnetin                                                                                 | 8.63 | 315 | 300, 301                                         |                                        | Isorhamnetin                              |
| Isorhamnetin                                                                              | 9.56 | 315 | 300, 301                                         |                                        | Isorhamnetin                              |
| Myricetin                                                                                 | 7.17 | 317 | 179, 151                                         |                                        | Isorhamnetin                              |
| Quercetin- <i>O</i> -pentoside                                                            | 6.61 | 433 | 301, 300                                         | 179,151,257                            | Quercetin- <i>O</i> -rutinoside (Rutin)   |
| Myricetin- <i>O</i> -rhamnoside                                                           | 6.12 | 463 | 301, 300, 316, 317                               |                                        | Luteolin- <i>O</i> -hexoside              |
| Quercetin- <i>O</i> -hexoside                                                             | 6.24 | 463 | 301, 300, 302                                    | 179,151,257                            | Quercetin- <i>O</i> -rutinoside (Rutin)   |
| Quercetin- <i>O</i> -glucuronide                                                          | 6.33 | 477 | 301                                              | 179, 151, 257, 273                     | Quercetin- <i>O</i> -rutinoside (Rutin)   |
| Myricetin- <i>O</i> -hexoside                                                             | 5.72 | 479 | 316, 317, 179, 461                               | 271, 179, 287, 270, 288, 151, 242, 272 | Luteolin- <i>O</i> -hexoside              |
| Kaempferol- <i>O</i> -rutinoside                                                          | 6.5  | 593 | 285                                              | 257,267,299,241,197                    | Quercetin- <i>O</i> -rutinoside (Rutin)   |
| Tetrahydroxy-<br>dimethoxyflavone- <i>O</i> -hexoside<br>(Syringetin- <i>O</i> -hexoside) | 6.75 | 507 | 345, 344, 461, 387, 201, 293, 417, 329, 439, 489 | 330, 301                               | Luteolin- <i>O</i> -hexoside              |
| Isorhamnetin- <i>O</i> -<br>dirhamnoside                                                  | 6.56 | 607 | 461                                              | 315, 135, 161                          | Luteolin- <i>O</i> -hexoside              |
| Quercetin- <i>O</i> -rutinoside<br>(Rutin)                                                | 6.02 | 609 | 301                                              | 179, 151, 257                          | Quercetin- <i>O</i> -rutinoside (Rutin)   |
| Isorhamnetin- <i>O</i> -rutinoside                                                        | 6.54 | 623 | 315                                              |                                        | Luteolin- <i>O</i> -hexoside              |
| <b>Flavanones</b>                                                                         |      |     |                                                  |                                        |                                           |

|                                                              |       |     |                    |                         |                                                 |
|--------------------------------------------------------------|-------|-----|--------------------|-------------------------|-------------------------------------------------|
| Naringenin                                                   | 8.79  | 271 | 151, 177           |                         | Naringenin                                      |
| Eriodyctiol                                                  | 7.89  | 287 | 151                |                         | Naringenin                                      |
| Tetrahydroxyflavanone                                        | 10.03 | 287 | 269, 241, 219, 113 |                         | Naringenin                                      |
| Naringenin-O-glucoside                                       | 5.19  | 433 | 271                | 151, 177                | Naringenin-7-O-rutinoside (Narirutin)           |
| Tetrahydroxyflavanone-O-rhamnoside(tentative identification) | 6.93  | 433 | 269, 287, 259, 301 |                         | Naringenin-7-O-rutinoside (Narirutin)           |
| Hesperetin-O-hexoside                                        | 7.06  | 463 | 301                | 179, 151, 286, 257      | Hesperetin-7-O-rutinoside (Hesperidin)          |
| Naringenin-7-O-rutinoside (Narirutin)                        | 6.29  | 579 | 271                | 151, 177                | Naringenin-7-O-rutinoside (Narirutin)           |
| Naringenin-7-O-neohesperidoside(Naringin)                    | 7.03  | 579 | 459, 541, 271, 235 | 357, 339, 235, 271, 441 | Naringenin-7-O-rutinoside (Narirutin)           |
| Naringenin-O-neohesperidoside                                | 7.11  | 579 | 459, 541, 271, 235 |                         | Naringenin-7-O-rutinoside (Narirutin)           |
| Isosakuranetin-O-rutinoside (Didymin)                        | 7.60  | 593 | 285                | 270, 243, 164, 151, 241 | Isosakuranetin-O-rutinoside (Didymin)           |
| Eriocitrin or Neoeriocitrin                                  | 5.92  | 595 | 459                | 357, 441, 235, 271      | *                                               |
| Naringenin-C-dihexoside                                      | 5.93  | 595 | 271, 475           |                         | Luteolin-8-C glucoside (Orientin)               |
| Hesperetin-7-O-rutinoside (Hesperidin)                       | 6.64  | 609 | 301                | 286, 283, 242,257       | Hesperetin-7-O-rutinoside (Hesperidin)          |
| Hesperetin-7-O-neohesperidoside (Neohesperidin)              | 6.76  | 609 | 301                | 286, 283, 242,257       | Hesperetin-7-O-neohesperidoside(Neohesperidin)  |
| <b>Hydroxybenzoic acids</b>                                  |       |     |                    |                         |                                                 |
| 3-Hydroxybenzoic acid                                        | 5.06  | 137 | 93                 |                         | 3-Hydroxybenzoic acid                           |
| 4-Hydroxybenzoic acid                                        | 4.64  | 137 | 109, 93            |                         | 3-Hydroxybenzoic acid                           |
| Hydroxybenzoic acid                                          | 4.31  | 137 | 109, 93            |                         | 3-Hydroxybenzoic acid                           |
| 3,4-Dihydroxybenzoic acid (Protocatechuic acid)              | 3.59  | 153 | 109                |                         | 3,4-Dihydroxybenzoic acid (Protocatechuic acid) |
| Dihydroxybenzoic acid                                        | 5.58  | 153 |                    |                         | 3,4-Dihydroxybenzoic acid (Protocatechuic acid) |
| Dihydroxyphenylacetic acid                                   | 3.20  | 167 | 123, 139, 149      |                         | 3,4-Dihydroxybenzoic acid (Protocatechuic acid) |
| Dihydroxyphenylacetic acid                                   | 4.36  | 167 | 123,139,149,81     |                         | 3,4-Dihydroxybenzoic acid (Protocatechuic acid) |
| Dihydroxyphenylacetic acid                                   | 5.09  | 167 | 123,81,139         |                         | 3,4-Dihydroxybenzoic acid (Protocatechuic acid) |
| Gallic acid                                                  | 2.10  | 169 | 125                |                         | Gallic acid                                     |
| Hydroxyphenyllactic acid                                     | 3.89  | 181 | 163, 113, 135, 151 |                         |                                                 |
| Ethyl-gallate                                                | 5.68  | 197 | 169, 168, 125      |                         | Gallic acid                                     |
| <b>Hydroxycinnamic acids</b>                                 |       |     |                    |                         |                                                 |
| Caffeic acid                                                 | 5.14  | 179 | 135                |                         | 3,4-Dihydroxybenzoic acid (Protocatechuic acid) |

|                                                  |      |     |                              |                                             |                                                  |
|--------------------------------------------------|------|-----|------------------------------|---------------------------------------------|--------------------------------------------------|
| 5-Caffeoylquinic acid                            | 4.75 | 353 | 191                          |                                             | 5-Caffeoylquinic acid                            |
| Ferulic acid- <i>O</i> -hexoside                 | 5.14 | 355 | 193                          |                                             | Luteolin- <i>O</i> -hexoside                     |
| <b>Phenylethanoids</b>                           |      |     |                              |                                             |                                                  |
| Tyrosol (tentative identification)               | 3.62 | 137 | 109,93,122                   |                                             | 3-Hydroxybenzoic acid                            |
| Hydroxytyrosol                                   | 3.37 | 153 | 123                          |                                             | Hydroxytyrosol                                   |
| Hydroxytyrosol- <i>O</i> -hexoside               | 3.20 | 315 | 135, 153, 113, 119, 179, 247 | 123                                         | Hydroxytyrosol                                   |
| Oleoside                                         | 4.25 | 389 | 345, 209, 121, 165           |                                             | Oleuropein                                       |
| Verbascoside (Caffeoyl phenylethanoid glycoside) | 5.95 | 623 | 461                          |                                             | Verbascoside (Caffeoyl phenylethanoid glycoside) |
| Verbascoside (Caffeoyl phenylethanoid glycoside) | 6.29 | 623 | 461                          |                                             | Verbascoside (Caffeoyl phenylethanoid glycoside) |
| <b>Coumarin</b>                                  |      |     |                              |                                             |                                                  |
| Scopoletin- <i>O</i> -hexoside                   | 4.75 | 353 | 191                          | 173, 171, 127, 85                           |                                                  |
| <b>Stilbenoid</b>                                |      |     |                              |                                             |                                                  |
| Piceid (Resveratrol- <i>O</i> -glucoside)        | 3.35 | 389 | 227, 183, 165, 209, 121, 139 |                                             | Piceid (Resveratrol- <i>O</i> -glucoside)        |
| <b>Seco-iridoid</b>                              |      |     |                              |                                             |                                                  |
| Oleuropein aglycone                              | 7.52 | 377 | 307, 275                     | 275, 139                                    |                                                  |
| Oleuropein aglycone                              | 8.11 | 377 | 307, 275                     | 275, 139                                    |                                                  |
| Oleuropein aglycone                              | 8.44 | 377 | 307, 275                     | 275, 139                                    |                                                  |
| Oleuropein aglycone                              | 9.04 | 377 | 307, 275                     | 275, 139                                    |                                                  |
| Oleuropein aglycone                              | 9.37 | 377 | 307, 275                     | 275, 139                                    |                                                  |
| Oleuropein                                       | 7.05 | 539 | 377, 307, 275                | 307, 275                                    | Oleuropein                                       |
| Oleuropein                                       | 7.39 | 539 | 377, 307, 275                | 307, 275                                    | Oleuropein                                       |
| <b>Anthocyanins</b>                              |      |     |                              |                                             |                                                  |
| Cyanidin-3- <i>O</i> -hexoside                   | 4.70 | 449 | 287                          | 287, 153                                    | Cyanidin-3- <i>O</i> -hexoside                   |
| Malvidin-3- <i>O</i> -arabinoside                | 5.42 | 463 | 331                          | 316, 315, 299, 298, 287, 270, 179, 242, 331 | Cyanidin-3- <i>O</i> -hexoside                   |
| Peonidin-3- <i>O</i> -hexoside                   | 5.15 | 463 | 301                          |                                             | Cyanidin-3- <i>O</i> -hexoside                   |
| Delphinidin 3- <i>O</i> -hexoside                | 4.50 | 465 | 303                          |                                             | Cyanidin-3- <i>O</i> -hexoside                   |
| Petunidin-3- <i>O</i> -hexoside                  | 4.86 | 479 | 317                          | 302                                         | Cyanidin-3- <i>O</i> -hexoside                   |
| Malvidin-3- <i>O</i> -hexoside                   | 5.21 | 493 | 331                          | 316, 315, 299, 298, 287, 270, 179, 242, 331 | Cyanidin-3- <i>O</i> -hexoside                   |



---

|                            |      |     |               |                         |
|----------------------------|------|-----|---------------|-------------------------|
| Cyanidin-3-O-rutinoside    | 4.86 | 595 | 287           | Cyanidin-3-O-rutinoside |
| Delphinidin 3-O-rutinoside | 4.60 | 611 | 303, 465, 287 | Cyanidin-3-O-rutinoside |

---

**TOTAL ((POLY))PHENOL**

---

HHDP: means hexahydroxydiphenoyl ; (epi)GC means (epi)gallocatechin ; (epi)C means (epi)catechin; n.q means compounds which have been identified but not quantified because <LOQ.

**Supplemental Table S2.** Spectrometric characteristics of quantified metabolites in plasma and urine samples. *m/z*: mass to charge ratio, RT: retention time; CE: collision energy.

| Id.                                           | Phenolic metabolites                                                                                        | Parent ion | RT    | S-lens | Quantifier ion    | CE  |
|-----------------------------------------------|-------------------------------------------------------------------------------------------------------------|------------|-------|--------|-------------------|-----|
|                                               |                                                                                                             | (m/z)      | (min) |        | Product ion (m/z) | (V) |
| (Epi)catechin derivatives                     |                                                                                                             |            |       |        |                   |     |
| 1                                             | Methoxy-(epi)catechin-glucuronide                                                                           | 479        | 3.47  | 92     | 303               | 35  |
| 2                                             | (Epi)catechin-glucuronide_isomer 1                                                                          | 465        | 3.83  | 98     | 289               | 27  |
| 3                                             | Methoxy-(epi)gallocatechin-glucuronide                                                                      | 495        | 3.89  | 98     | 319               | 27  |
| 4                                             | (Epi)catechin-glucuronide_isomer 2                                                                          | 465        | 4.21  | 98     | 289               | 27  |
| 5                                             | (Epi)catechin-sulfate_isomer 1                                                                              | 369        | 4.44  | 93     | 289               | 20  |
| 6                                             | (Epi)catechin-sulfate_isomer 2                                                                              | 369        | 4.73  | 93     | 289               | 20  |
| 7                                             | Methoxy(epi)catechin-sulfate                                                                                | 383        | 4.97  | 92     | 303               | 20  |
| Phenyl-γ-valerolactones & phenylvaleric acids |                                                                                                             |            |       |        |                   |     |
| 8                                             | 5-(Dihydroxyphenyl)-γ-valerolactone-glucuronide                                                             | 399        | 2.00  | 87     | 223               | 30  |
| 9                                             | 5-(Methoxyhydroxyphenyl)-γ-valerolactone- glucuronide                                                       | 413        | 2.03  | 87     | 222               | 30  |
| 10                                            | 5-(5-Hydroxyphenyl)-γ-valerolactone-3-glucuronide                                                           | 383        | 2.32  | 92     | 207               | 27  |
| 11                                            | 4-Hydroxy-5-(methoxyphenyl)valeric acid-glucuronide<br>(4-Hydroxy-5-phenylvaleric acid-methoxy-glucuronide) | 415        | 3.56  | 93     | 239               | 30  |
| 12                                            | 5-(Methoxyphenylvaleric) acid-sulfate                                                                       | 303        | 3.65  | 80     | 223               | 20  |
| 13                                            | 5-(Phenyl)-γ-valerolactone-sulfate-glucuronide                                                              | 463        | 3.83  | 87     | 287               | 27  |
| 14                                            | 5-(Methoxy-phenylvaleric) acid--glucuronide                                                                 | 399        | 3.99  | 80     | 223               | 30  |
| 15                                            | 4-Hydroxy-5-(Hydroxyphenyl)valeric acid-sulfate                                                             | 305        | 4.00  | 95     | 225               | 20  |
| 16                                            | 5-(5-Hydroxyphenyl)-γ-valerolactone-3-sulfate                                                               | 287        | 4.14  | 96     | 207               | 23  |
| 17                                            | 5-(Phenyl)-γ-valerolactone-3-glucuronide                                                                    | 367        | 4.30  | 93     | 191               | 25  |
| 18                                            | 4-Hydroxy-5-(phenyl)valeric acid-sulfate                                                                    | 289        | 4.32  | 95     | 209               | 20  |
| 19                                            | 4-Hydroxy-5-(methoxy-phenyl)valeric acid--sulfate                                                           | 319        | 4.35  | 63     | 224               | 30  |
| 20                                            | 5-(Methoxy-hydroxyphenyl)-γ-valerolactone--sulfate                                                          | 317        | 4.38  | 97     | 222               | 40  |
| 21                                            | 5-(3-Hydroxyphenyl)-γ-valerolactone-4-sulfate                                                               | 287        | 4.70  | 96     | 207               | 23  |
| 22                                            | 5-(Methoxy-phenyl)-γ-valerolactone-sulfate                                                                  | 301        | 4.88  | 96     | 221               | 23  |
| 23                                            | 5-(Phenyl)-γ-valerolactone-3-sulfate                                                                        | 271        | 5.02  | 93     | 191               | 23  |
| 24                                            | 5-(Hydroxyphenyl)valeric acid-sulfate                                                                       | 289        | 5.56  | 95     | 209               | 20  |
| Flavanone derivatives                         |                                                                                                             |            |       |        |                   |     |
| 25                                            | Naringenin-diglucuronide                                                                                    | 623        | 4.51  | 100    | 447               | 25  |
| 26                                            | Hesperetin-diglucuronide                                                                                    | 653        | 4.80  | 115    | 301               | 26  |
| 27                                            | Naringenin-glucuronide                                                                                      | 447        | 5.15  | 100    | 271               | 26  |
| 28                                            | Hesperetin-7-glucuronide                                                                                    | 477        | 5.27  | 115    | 301               | 27  |

|                                                 |                                                                                |     |      |     |     |    |
|-------------------------------------------------|--------------------------------------------------------------------------------|-----|------|-----|-----|----|
| 29                                              | Hesperetin-sulfate                                                             | 381 | 6.61 | 84  | 301 | 24 |
| <b>Other flavonoid derivatives</b>              |                                                                                |     |      |     |     |    |
| 30                                              | Luteolin-glucuronide                                                           | 461 | 5.78 | 90  | 285 | 27 |
| 31                                              | Myricetin-glucuronide                                                          | 493 | 4.01 | 90  | 317 | 27 |
| 32                                              | Quercetin-diglucuronide                                                        | 653 | 4.30 | 115 | 301 | 26 |
| 48                                              | Luteolin-sulfate                                                               | 365 | 6.19 | 90  | 285 | 20 |
| <b>Phenylethanoid derivatives</b>               |                                                                                |     |      |     |     |    |
| 33                                              | 2-(Phenyl)ethanol-3'-glucuronide<br>(Hydroxytyrosol-glucuronide)               | 329 | 1.55 | 64  | 153 | 20 |
| 34                                              | Oleuropein-sulfate                                                             | 619 | 5.05 | 100 | 539 | 20 |
| <b>Hydroxybenzoic acids and simple benzenes</b> |                                                                                |     |      |     |     |    |
| 35                                              | 4-Hydroxybenzoic acid-3-glucuronide (Protocatechuic acid-3-glucuronide)        | 329 | 1.44 | 81  | 153 | 21 |
| 36                                              | Dihydroxybenzene-sulfate<br>(Pyrogallol-sulfate)                               | 205 | 2.40 | 68  | 125 | 20 |
| 37                                              | Methoxyhydroxybenzene-sulfate<br>(Pyrogallol-methoxy-sulfate)                  | 219 | 3.78 | 68  | 124 | 24 |
| 38                                              | Methoxy-hydroxybenzoic acid-sulfate<br>(Gallic acid-methoxy-sulfate)           | 263 | 2.96 | 68  | 168 | 26 |
| 39                                              | 3,5-Dimethoxy-4-hydroxybenzoic acid<br>(Syringic acid)                         | 197 | 4.24 | 70  | 182 | 20 |
| 45                                              | 4-Hydroxybenzoic acid-3-sulfate<br>(Protocatechuic acid-3-sulfate)             | 233 | 2.42 | 85  | 153 | 20 |
| 47                                              | 4'-Hydroxyhippuric acid                                                        | 194 | 1.50 | 72  | 100 | 11 |
| <b>(Hydroxyphenyl)propanoic acids</b>           |                                                                                |     |      |     |     |    |
| 40                                              | 3-(3'-Hydroxyphenyl)propanoic acid<br>(3-(3-Hydroxyphenyl)propionic acid)      | 165 | 3.25 | 48  | 121 | 13 |
| 41                                              | 3-(4'-hydroxyphenyl)propanoic acid-3'-sulfate<br>(Dihydrocaffeic acid-sulfate) | 261 | 4.04 | 96  | 181 | 20 |
| 46                                              | 3-(3'-Methoxyphenyl)propanoic acid-4'-sulfate<br>(Dihydroferulic acid-sulfate) | 275 | 4.39 | 75  | 195 | 31 |
| <b>Ellagitannin derivatives</b>                 |                                                                                |     |      |     |     |    |
| 42                                              | 8-Hydroxy-urolithin-3-glucuronide                                              | 307 | 7.10 | 78  | 227 | 19 |

|    |                                    |     |      |    |     |    |
|----|------------------------------------|-----|------|----|-----|----|
|    | (Urolithin A-glucuronide)          |     |      |    |     |    |
| 43 | 9-Hydroxy-urolithin-3-glucuronide* | 307 | 7.03 | 78 | 227 | 19 |
|    | (Isourolithin A-glucuronide)       |     |      |    |     |    |
| 44 | Urolithin-3-glucuronide            | 387 | 5.24 | 78 | 211 | 37 |
|    | (Urolithin B-glucuronide)          |     |      |    |     |    |

---

\* Qualifier ion ( $m/z$ ) = 171
